# Supplementary material for: Using elemental analyses and multivariate statistics to identify the off-site dispersion from informal e-waste processing
Source: Royal Society of Chemistry journal article supplement (doi:10.1039/c9em00444k), 2019-01-01
Supplement: c9em00444k2.xlsx [file c9em00444k2.xlsx]

## Sheet: Concentrations (mg.kg-1)
Name	Longitude (west)	Latitude (north)	Li7	Be9	Na23	Mg24	Al27	Si28	S32	Cl35	K39	Ca44	Sc45	Ti47	V51	Cr52	Mn55	Fe56	Co59	Ni60	Cu63	Zn66	Ga69	Ge74	As75	Se77	Br79	Rb85	Sr88	Y89	Zr90	Nb93	Mo95	Ru101	Rh103	Pd105	Ag107	Cd111	In115	Sn118	Sb121	Te125	Cs133	Ba137	La139	Ce140	Pr141	Nd146	Sm147
GH01	-0.128633	5.56478	0.65133	0.0228812	1926.62	1046.11	1074.65	562.252	338.893	1800.67	349.029	39062.3	0.107366	56.3232	3.83168	1.75477	24.7217	2328.46	0.40192	1.65063	2.74789	21.4042	0.389504	0.0179387	2.03709	0.22347	663.841	0.717405	191.287	0.94027	1.158	0.0878096	0	0	0.0149275	0.97737	0.0548959	0.00240229	0.00679209	1.97107	0	0.0743521	0.152938	9.42482	1.16727	2.36262	0.409531	1.32911	0.290525
GH02	-0.145467	5.56255	1.9824	0.228894	816.27	3394.65	10837.1	2357.39	340.151	508.029	1079.73	10794.2	2.98856	377.869	42.6324	50.903	232.893	25600.9	4.70904	11.8677	19.1007	152.269	3.53111	0.253322	0.88875	0.301356	665.385	5.02173	39.6493	3.84538	6.90191	0.126207	1.46024	0	0.00275481	2.94485	0.228856	0.142019	0.0268111	1.72308	0.0912019	0.0589423	0.318077	70.1858	4.20168	13.0463	1.53904	5.16058	1.14465
GH03	-0.1591	5.55947	2.37215	0.246666	681.317	2832.93	9971.92	1837.84	275.264	498.962	866.194	12021.9	3.12597	325.62	42.0202	53.3277	252.469	24257.1	5.39756	13.479	28.1596	242.589	3.17178	0.25953	1.72364	0.278985	529.408	4.70397	44.4817	3.78712	6.35445	0.0728051	1.2937	0	0.00277265	2.76645	0.330604	0.231103	0.0250864	1.63923	0.100834	0.0906473	0.295877	127.985	4.99602	14.2481	1.84681	6.22054	1.2948
GH04A	-0.1605	5.55465	0.358853	0.0382691	1450.49	1243.01	1086.09	369.868	268.833	937.8	274.275	63711.9	0.171143	37.1392	5.58913	4.51456	54.8404	3493.71	0.537455	1.4031	2.24637	25.9602	0.485579	0.0311063	2.69601	0.0964037	509.156	0.68296	310.397	1.05778	1.92022	0.0885625	0.207988	0	0.0282914	1.14767	0.0676775	0.0071928	0.00864301	0.542027	0.0109822	0.0350457	0.135497	8.41557	1.35584	2.327	0.475954	1.61266	0.332379
GH04B	-0.1605	5.55465	0.0711548	0.0451492	1795.32	1387.82	946.489	256.226	303.375	770.334	233.813	73020.5	0.0449307	29.5761	7.89377	6.06411	21.0123	5594.59	0.299567	1.27703	2.93492	20.5035	0.43331	0.0351403	1.62494	0.0799006	596.468	0.403415	414.851	0.573172	1.58646	0.0663689	0.156886	0	0.0305118	0.680311	0.0644283	0.00351403	0.00730484	1.00688	0.0300703	0.105902	0.139644	10.8921	0.807048	1.51803	0.270362	0.931307	0.184832
GH04C	-0.1605	5.55465	0	0.0042708	1383.61	3233.37	780.263	237.717	332.758	790.412	302.034	71198.4	0.0181172	26.3665	4.23978	2.41615	20.4366	2105.95	0.270454	0.940789	2.59485	20.8303	0.324491	0.0103128	2.01312	0.0506606	605.374	0.616478	319.581	0.759842	1.28542	0.0601328	0.0213135	0	0.0257731	0.743559	0.0450636	0.00521037	0.00578047	0.532411	0.0155097	0.0787625	0.144982	10.6627	1.01537	1.6555	0.368804	1.07889	0.266313
GH05	-0.172083	5.55468	7.05773	0.735596	1496.06	6966.01	26564.1	2206.87	372.436	885.56	2192.62	25677.1	6.22003	594.488	91.582	130.744	688.179	82606.5	16.8141	339.196	238.583	750.625	8.00393	0.717501	8.69002	0.312449	692.478	16.1715	84.3876	7.08458	19.4077	0.0888055	8.69228	0	0.0213243	4.79567	0.655599	1.23063	0.053872	4.18761	4.33538	0.124063	0.766188	230.653	9.54029	30.706	3.57082	12.3813	2.41596
GH06	-0.18595	5.54582	0.979678	0.0592188	1838.1	932.308	1530.6	456.315	318.342	1476.74	257.059	35577.8	0.580511	73.4735	4.75199	5.14418	70.2247	4541.05	0.824059	1.61089	2.11717	24.1832	0.478887	0.0585603	2.79479	0.0255356	585.603	0.396138	186.64	2.12165	2.31437	0.0632882	0.645687	0	0.0124891	1.68064	0.0734506	0.00872259	0.00708864	0.362337	0.0268219	0.0827922	0.157507	8.10437	3.26898	6.91394	1.14924	4.11191	0.825881
GH07	-0.18625	5.54982	1.17041	0.408637	383.138	2615.62	7474.16	1840.74	341.018	128.772	752.248	12728.3	1.85916	205.968	33.8194	37.8797	132.086	18411.4	3.81678	8.51809	13.4513	92.6365	2.14631	0.145206	3.82233	0.203763	659.038	3.79818	54.0765	2.83427	4.01577	0.12521	0.994009	0	0.000262901	1.92565	0.144343	0.195073	0.0170377	0.357149	0.162602	0.0895351	0.314043	69.9859	2.30396	5.99112	0.85478	2.97614	0.719138
GH08	-0.195783	5.5438	2.59149	0.109437	2642.86	2062.88	2959.29	914.044	380.705	2365.97	353.014	42741.8	1.0897	127.177	10.4939	9.51598	95.4249	14429.9	2.46132	5.56154	3.97769	28.3516	1.21565	0.162437	9.53747	0.0251763	602.867	0.754482	219.077	2.2949	2.65178	0.0637507	0.328566	0	0.0146095	1.79577	0.0878187	0.0109527	0.0128623	1.32881	0.0644776	0.119443	0.177998	9.05315	2.81633	6.15229	0.994435	3.91577	0.78345
GH09	-0.197433	5.548	4.66623	0.261807	792.876	1531.2	12650.6	2203.84	745.61	542.643	1674.94	10438.7	2.37089	315.466	35.3781	35.8259	139.017	20933.8	3.01513	7.2995	23.899	75.141	3.845	0.226268	2.70278	0.217933	696.98	9.38598	40.3281	4.24914	8.28767	0.110007	0.990954	0	0.000781121	2.81034	0.274609	0.0935511	0.027815	0.920412	0.0595015	0.0837739	0.63816	90.4842	5.54292	13.4586	1.79365	6.52278	1.3335
GH10	-0.200233	5.54745	1.83096	0.275219	320.681	2597.03	11196.2	2446.57	421.923	113.97	1145.64	9825.04	2.95357	429.903	45.9745	88.7925	465.976	29841.2	5.25739	11.2114	27.6403	138.719	3.55844	0.295066	2.68395	0.13262	793.681	5.78139	35.5306	5.95574	6.91342	0.179357	1.48447	0	0	4.07138	0.263626	0.520481	0.0303848	1.22437	0.118019	0.131834	0.422535	79.117	8.52911	23.5472	2.71859	10.2628	2.06429
GH11	-0.206283	5.54503	1.7479	0.114138	1421.45	1406.48	5845.58	2309.71	405.829	1494.15	1236.94	10016.3	1.46122	316.994	22.2162	30.7302	320.753	14141.4	2.61113	5.85312	36.4324	133.572	1.86429	0.153384	1.09638	0.0557175	718.137	5.31107	50.0665	3.33532	5.63062	0.22627	0.796162	0	0.00172709	2.50506	0.224425	0.494629	0.0248821	2.0657	0.265071	0.07375	0.336944	70.6536	3.45327	8.68872	1.2567	4.45241	0.964071
GH12A	-0.209533	5.54572	1.0336	0.092797	559.927	1373.59	5487.87	1983.61	349.408	691.308	1021.12	11538.3	1.28102	228.498	18.8367	23.045	149.787	12060.2	2.65017	6.01873	39.1145	126.658	1.85481	0.129346	1.21939	0.106407	653.019	3.94023	44.9419	1.80694	5.05003	0.161938	0.788534	0	0.00166622	1.37694	0.395164	0.747876	0.0233712	0.943305	0.399695	0.0463493	0.27844	62.1379	2.53874	7.3024	0.792623	2.54125	0.514994
GH12B	-0.209533	5.54572	1.59002	0.123316	728.727	2067.57	6706.72	1581.98	270.161	684.309	1163.77	12613.9	1.8831	251.247	24.0858	35.5026	207.011	18217.5	3.4844	11.3551	117.868	213.049	2.17306	0.235151	1.72526	0.106145	499.335	5.00351	54.7115	3.54456	8.53186	0.103034	1.17968	0	0.0101389	2.64249	0.576024	0.625717	0.0505641	9.7126	0.521712	0.0796868	0.294871	111.569	6.07044	14.2853	2.28798	7.68254	1.62309
GH12C	-0.209533	5.54572	0.965109	0.0892817	603.011	1478.12	5835.82	2132.96	363.606	533.179	1032.96	15723.8	1.34129	225.953	17.4289	21.6379	148.512	11804.8	2.75025	5.78253	51.6517	167.447	1.87103	0.148366	1.30933	0.0566222	653.83	3.96533	79.4658	2.5381	7.24836	0.179888	5.04274	0	0.00533326	1.92791	0.389998	0.438278	0.0262566	2.51348	0.382685	0.0775613	0.28321	56.9155	3.43614	9.05148	1.2499	4.3748	0.894669
GH13	-0.21465	5.54582	1.42258	0.147329	610.609	2192.71	7431.19	2227.87	359.11	1039.35	1060.42	15020.7	1.73017	281.463	23.9261	50.3454	259.631	18975.1	3.72522	15.6673	120.891	342.541	2.16577	0.210616	2.1202	0.0753494	668.588	4.6271	50.7265	2.9086	7.41181	0.188635	2.061	0	0.0102008	2.36331	0.78641	0.586161	0.0321698	2.07674	0.445759	0.0741925	0.329264	87.6513	3.13947	7.54767	1.18119	3.80338	0.954483
GH14	-0.217017	5.5457	0.99094	0.100871	496.028	1622.2	6336.18	1661.47	344.386	379.206	981.441	12994.2	1.42403	222.208	19.9999	73.5125	224.025	23895.1	3.97482	26.4905	134.25	315.618	2.05663	0.251969	3.09444	0.0704173	519.962	4.26751	54.9086	2.04636	7.55793	0.158632	4.94717	0	0.0113499	1.67056	0.323166	0.608593	0.0249461	1.93278	0.328261	0.0940858	0.27457	72.4267	4.75449	9.92964	1.3668	4.15734	0.690646
GH15A	-0.20955	5.53423	1.33292	0.0569195	3754.36	1796.85	1416.89	952.698	328.177	3419.68	456.669	62436.4	0.176866	60.1228	4.28078	2.71439	58.1897	3751.83	0.635409	1.23143	2.12147	23.43	0.440351	0.0415698	2.48069	0.0162747	594.335	1.06421	323.69	1.62114	2.70838	0.113573	0.381692	0	0.0346828	1.95276	0.0880304	0.0132606	0.00755118	0	0.00783417	0.0745353	0.172263	12.7637	1.98063	4.32681	0.894185	2.72722	0.661156
GH15B	-0.20955	5.53423	1.4918	0.0678338	3957.35	2116.65	1440.06	975.759	481.624	3536.23	489.182	72677.6	0.228797	63.7763	4.75837	2.66731	43.681	4069.96	0.714689	1.17028	2.15649	24.7559	0.442671	0.0338668	2.97409	0	609.822	1.0433	378.802	1.69398	1.92939	0.0962685	0.114066	0	0.0317923	1.60841	0.0664052	0.0138488	0.00708301	0	0	0.0815279	0.168606	14.4153	1.93219	4.39104	0.761276	2.75725	0.5905
GH15C	-0.20955	5.53423	1.56527	0.079091	3839.85	2059.22	1463.61	963.673	618.164	3642.29	456.473	61080.7	0.194286	68.2248	4.59489	3.10967	54.2117	4153.65	0.666416	1.01223	2.31292	23.7379	0.411228	0.0252954	3.97597	0	606.653	0.950596	370.441	1.38557	1.60202	0.0875562	0.052975	0	0.0282494	1.0705	0.0550446	0.0110226	0.00600714	0	0	0.0634095	0.180291	12.6397	1.47871	3.09585	0.530826	1.99241	0.394229
GH16	-0.219267	5.53067	0	0	1050.06	11.9143	73.849	0	234.779	609.191	79.9455	78059.4	0	4.98102	0.77269	0	16.0648	355.301	0.0987708	1.18083	1.35819	17.0047	0.0908014	0	0.351565	0	1443.03	0	318.466	0.240338	0.417004	0.0140952	0	0	0.0258387	0.403615	0.0235258	0.0018676	0.00378617	0	0	0.0732624	0.0812004	2.5292	0.343784	0.685434	0.112044	0.319468	0.0801426
GH17	-0.229683	5.52798	0	0	2651.68	555.132	298.959	160.181	333.313	2555.43	294.26	68574.8	0	7.98924	0.873054	0	6.93435	436.233	0.0637742	1.54843	1.92842	26.9566	0.171023	0	0.422729	0	2063.3	0.338784	309.284	0.675852	0.64635	0.0183275	0	0	0.0225496	0.603555	0.027389	0.010067	0.00377423	0	0	0.11021	0.115532	8.89993	0.48925	0.894641	0.162401	0.540407	0.126755
GH18	-0.222783	5.53703	1.11012	0.0915239	290.22	919.545	4963.81	2042.31	359.836	515.06	790.712	6967.32	0.924713	190.172	19.2294	38.1807	142.699	13916.1	2.38233	29.1366	60.3229	105.93	1.6563	0.134796	1.21352	0.0521705	2434.41	3.74852	35.0788	2.08159	4.12291	0.181979	1.15729	0.000105019	0.0182542	1.45927	0.172536	0.119865	0.0131931	0	0.466441	0.08992	0.272818	55.9503	9.50887	21.0499	2.66632	8.46922	1.10597
GH19A	-0.23785	5.53503	0.829303	0.0619225	145.173	639.935	4424.05	1659.62	1108.84	424.32	484.061	6310.46	0.69972	150.094	12.9207	18.4335	74.5583	10016.4	7.12143	7.10447	90.2195	69.5351	1.46591	0.0928483	1.12655	0.0452483	2211.28	2.44107	26.1557	1.59396	3.78537	0.135567	0.62309	0.00696595	0.00274833	0.992715	0.120732	0.0712543	0.0101602	0	0.0866575	0.136935	0.24276	35.2038	1.9003	5.13783	0.581396	2.15747	0.439774
GH19B	-0.23785	5.53503	0.874762	0.079313	184.7	828.261	4731.78	1624.98	308.697	275.424	515.541	8775.2	0.813581	165.138	13.4876	22.1128	89.2471	9219.96	1.95078	4.62212	11.147	74.1167	1.40617	0.0804154	0.583105	0.0246647	2034.01	2.64617	36.115	1.62219	3.0477	0.120436	0.347587	0.00113646	0	1.04806	0.103486	0.0659145	0.0114829	0	0.0473939	0.154157	0.239204	33.4636	1.88403	7.0971	0.624674	2.4665	0.471762
GH19C	-0.23785	5.53503	1.12635	0.108191	150.565	664.636	5215.05	1535.66	283.637	345.835	470.457	6217.02	0.767827	151.169	16.1031	20.0821	98.022	9646.51	1.832	4.46358	22.8591	95.703	1.58631	0.0912478	0.900243	0.0353391	1906.83	2.81929	27.9084	1.56885	3.66336	0.111417	0.417125	0	0.000541507	1.06926	0.12526	0.0851234	0.0121308	0	0.0774794	0.101744	0.265512	33.0559	1.90635	10.0839	0.664311	2.27093	0.470543
GH20	-0.264617	5.52912	1.07193	0.0636513	471.076	792.743	4221.51	1713.56	278.741	547.904	738.441	14446.7	0.623775	167.976	10.215	11.0872	64.2574	5807.8	1.51425	3.93728	10.6739	80.0709	1.28936	0.0677852	1.28856	0.0405479	1820.45	3.77519	56.0582	1.29655	3.49989	0.130486	0.367582	0	0.001255	0.837781	0.118689	0.74196	0.0103069	0	0.122671	0.11145	0.249494	36.164	2.06384	5.16778	0.695065	2.45205	0.51493
GH21	-0.22405	5.55223	3.33281	1.04417	1599.86	1069.04	21605	1401.88	1295.5	2319.09	1583.58	8095.52	4.68696	258.124	124.696	148.597	134.228	60562.9	3.50987	9.48628	40.1219	119.745	7.15671	0.349926	2.66245	0.340349	1211.39	10.2694	40.0156	6.23229	11.2872	0.193138	2.51295	0	0.00284497	3.93641	0.725418	0.338712	0.0734737	0.340983	0.241525	0.0753463	0.402522	77.0533	8.29035	14.3324	2.60344	8.9289	1.69501
GH22A	-0.224633	5.5508	6.90134	0.41764	3379.91	2829.97	18344.9	2199.94	948.073	5259.45	3128.77	16354.8	2.55915	304.788	26.4732	31.6223	262.029	18354.8	5.50941	11.9765	179.478	361.018	4.67886	0.263154	2.6007	0.0915436	2242.95	16.678	97.5538	5.55952	10.1454	0.167497	1.25117	0	0.00617909	2.42559	0.444299	0.550861	0.0833383	2.59856	1.02014	0.0934616	0.88372	149.115	6.85106	18.2616	1.47738	8.21072	1.01871
GH22B	-0.224633	5.5508	4.98853	0.345567	2215.6	1875.2	13619.5	2048.83	763.264	3513.51	2289.02	10567.6	1.89999	247.443	24.9598	28.5484	195.276	34380.5	3.85606	9.20862	104.467	262.172	4.15349	0.235695	2.98881	0.0657729	2010.64	11.8339	57.6601	4.051	11.5841	0.13345	1.01151	0	0.0110471	2.53543	0.507784	0.724459	0.0600509	1.78358	1.61291	0.125577	0.674111	111.455	7.9913	18.8275	1.83205	9.33005	1.27985
GH22C	-0.224633	5.5508	4.76031	0.317974	2183.38	1733.63	12497.7	1925.29	564.398	3489.23	2155.21	9626	1.69053	237.382	23.6044	42.64	200.263	20499.6	3.99345	10.8349	104.099	395.514	3.70976	0.377071	1.48531	0.230831	2027.15	11.6121	47.4646	3.59238	11.7098	0.177933	1.51994	0	0.00616902	2.41714	0.431129	0.76942	0.0582674	1.24901	0.858916	0.11759	0.670317	124.924	4.37369	11.0924	2.67658	5.23877	1.7715
GH23	-0.224517	5.54858	4.06356	0.282075	2783.47	1775.31	10544.2	2254.38	1153.13	4200.43	1874.59	12260.8	1.37079	259.252	19.999	22.1471	165.245	12953.5	3.5896	9.16823	61.6054	188.012	3.10426	0.186362	1.96896	0.0666525	2503.13	10.6031	62.1737	3.46999	8.57704	0.243277	1.34762	0	0.00527266	2.17211	0.647632	0.573412	0.0550531	8.14417	0.670484	0.0825337	0.605315	90.8753	4.31953	10.3003	1.36659	4.84201	0.981644
GH24	-0.22405	5.54718	0.791356	0.0595211	1386.56	520.303	3298.31	999.623	340.369	1982.51	823.204	6563.17	0.28051	102.483	7.75474	6.14819	54.0918	4799.27	1.32357	3.40723	12.3136	57.4599	1.00279	0.048063	1.72705	0.00597643	1650.12	3.09548	33.1964	0.914221	2.30195	0.135731	0.33334	0	0.000443434	0.634961	0.14399	0.141982	0.0103638	0	0.222865	0.0692849	0.196076	27.5383	1.17117	2.97366	0.370436	1.21131	0.251
GH25	-0.22455	5.55302	8.32731	0.309864	1146.72	2650.81	16393.2	1804.97	1672.05	3582.42	1747.24	26901.2	1.81744	296.259	27.3804	78.5712	799.765	54178.7	16.8046	44.3081	9022.68	2914.33	4.37735	0.564214	5.93658	0.221139	1898.51	10.6482	86.9478	8.48636	15.7998	0.0296018	8.23651	0.00460846	0.499465	6.39446	5.86797	3.84207	0.906039	84.3849	7.61382	0.112748	1.02031	774.511	6.50135	38.6752	1.96738	6.99053	1.22887
GH26A	-0.224917	5.55253	4.45481	0.0657985	2031	1230.93	4195.18	2937.96	15409.3	2944.53	1828.82	8196.01	0.165987	232.711	5.8156	23.3331	189.906	33310.6	651.507	53.6605	644.054	40301.9	1.65018	0.33246	1.23159	0.138791	2754.01	5.24993	24.9257	1.8225	4.86935	0.0592125	4.66382	0	0.0384407	1.55388	2.38692	2.45357	0.0840406	3.2887	7.09521	0.147408	0.276875	113.304	2.20728	3.27177	0.674026	3.00245	0.28354
GH26B	-0.224917	5.55253	4.32928	0.0438122	2088.28	1201.29	4154.63	2767.69	11569.3	2781.93	1805.41	7465.96	0.142946	278.649	5.45771	24.1314	184.484	30966.1	573.368	28.5724	1053.05	35357.5	1.49189	0.271983	1.33134	0.0557773	2389.26	5.19493	24.2652	1.57941	4.09581	0.0253072	2.34499	0	0.0539212	1.17275	3.27146	2.304	0.11702	57.7082	4.60913	0.1178	0.273463	109.071	2.00593	3.01883	0.530503	2.71853	0.259124
GH26C	-0.224917	5.55253	3.66937	0.0177966	1718.12	991.753	3941.18	3198.32	13336.5	2976.46	1619.99	6514.03	0.120246	174.722	6.66685	45.9932	420.36	115789	547.369	86.695	819.271	32780.4	2.27564	1.17343	3.44013	0.0634259	2537.2	4.39998	20.1109	1.49607	4.24827	0.0759743	6.59992	0	0.0430467	1.11692	1.67537	1.69753	0.076716	2.45598	9.38497	0.102555	0.263516	83.3035	1.93645	2.60638	0.51646	2.32813	0.241885
GH27A	-0.225483	5.55095	7.84379	0.191404	582.551	12139.1	28611.9	2696.34	1934.52	120084	609.293	207444	0.295914	895.603	8.50166	65.8535	67.9064	2972.25	8.50937	113.728	14182.4	5046.68	4.68118	0.120972	17.8706	0.484201	2585.4	2.46196	190.658	2.65365	8.38479	0.00920093	8.02161	0.0141028	0.795103	3.92308	4.17489	14.6067	8.16061	3054.68	378.195	1.00035	0.425741	1506.05	5.46211	9.98854	0.570187	2.17527	0.410846
GH27B	-0.225483	5.55095	7.39141	0.148176	598.09	8700.32	32658.5	2359.46	1082.77	121052	589.843	202912	0.32046	697.739	5.24693	72.7215	76.1903	4084.35	11.3986	38.4944	33363.6	3870.77	5.19347	0.096596	19.0175	0.424712	2234.74	2.50328	182.498	2.08832	7.73676	0.00508	6.55429	0.020196	1.3754	4.85424	8.82105	14.1886	29.4015	13116.6	155.962	1.63737	0.400344	1369.69	5.73317	10.158	0.573864	2.61143	0.345852
GH27C	-0.225483	5.55095	4.78809	0.0875604	459.249	7090.24	16357	2337.09	784.618	115989	473.927	185492	0.166443	710.254	4.54207	54.8134	63.0213	2856.13	22.5129	40.9661	109803	7535.14	2.77071	0.0678584	17.6635	0.635069	2415.28	1.97509	166.556	1.85245	6.20929	0.0155106	7.43796	0.0574597	4.86996	14.3208	3.22497	10.8032	7.77475	3400.65	319.714	1.13718	0.382244	1264.37	3.75922	5.604	0.418345	1.79901	0.281596
GH28	-0.225917	5.55182	6.22865	0.382437	3410.65	2270.08	23290.5	1336.52	1226.57	9139.07	2409.15	16719.3	2.35527	216.301	33.6443	54.5164	303.029	39634.5	8.92577	25.1131	1350.75	898.989	5.58971	0.382018	7.47474	0.584697	1436.69	11.9809	102.556	5.76485	12.0163	0.0637331	3.8481	0	0.0639421	3.39343	2.62791	1.98455	0.333354	58.5099	3.02567	0.14974	0.75393	821.113	10.1938	22.9126	3.05593	11.3085	1.6751
GH29A	-0.2264	5.5532	3.3669	0.174263	1632.27	1967.73	11221.5	2180.73	1147.27	1736.96	2200.74	26451	1.0449	222.752	15.0668	39.969	238.558	25798.1	5.89973	23.2632	1020.73	852.506	2.58514	0.322199	7.23212	0.201223	1306.58	7.1364	106.232	3.32301	11.2875	0.0802745	5.48233	0	0.0731007	2.6187	3.57159	1.9218	0.271557	18.6468	3.56098	0.067452	0.373268	473.985	9.71163	7.80982	1.10778	3.47627	0.721108
GH29B	-0.2264	5.5532	3.53334	0.173722	1478.82	1868.76	10804.2	1474.76	1625.55	1919.64	2215.12	30785.7	1.07212	192.503	15.3022	44.4038	616.69	49052.7	12.002	35.6571	864.598	1043.45	2.67495	0.547363	8.3849	0.285324	1334.97	7.42719	99.1194	3.41141	10.7001	0.394813	6.12431	0.00094406	0.0857778	2.96783	3.99473	1.83791	0.320689	19.8322	5.39919	0.110353	0.412234	579.142	3.23129	14.8043	1.22285	3.68902	0.760611
GH29C	-0.2264	5.5532	3.52341	0.205901	1727.28	3295.87	11020	1400.38	1066.09	1392.48	2202.94	18232	1.90402	218.745	18.4139	37.6684	221.672	24192.9	6.87633	22.3828	958.315	807.531	2.83073	0.31536	6.60929	0.176998	960.346	6.71668	102.251	3.69366	10.4618	0.0459492	5.04412	0	0.0621439	2.81003	3.24479	1.61487	0.221572	13.5492	7.80966	0.0769014	0.331941	462.289	3.8719	9.89267	1.98879	5.93439	1.09906
GH30	-0.2252	5.554	4.10121	0.31262	9124.67	2296.93	15124.8	1643.53	2121.34	12266.2	5641.77	14744.4	2.223	237.322	33.8722	54.524	311.443	38501.9	17.3013	23.4782	1148.14	956.695	3.86742	0.47415	3.9196	0.330525	1416.82	11.851	70.0317	4.10534	17.1883	0.131919	6.49328	0	0.0753609	3.01348	3.75524	1.82185	0.242882	23.8541	2.58969	0.178129	0.544055	242.673	7.28336	17.2267	2.83507	7.61978	1.45609
GH31	-0.180533	5.569	1.03758	0.212315	203.087	1379.63	6507.98	1376.26	199.462	137.494	440.405	4339.15	1.67199	151.189	38.2642	40.7987	126.852	21454.6	2.99303	6.30567	10.5919	45.6634	2.03171	0.191233	1.50561	0.134197	1182.66	2.66576	15.9383	3.23236	5.03203	0.124474	1.92167	0	0.00507336	2.24521	0.171715	0.0757109	0.0243695	1.97641	0.0984822	0.0617969	0.192462	28.5092	1.96342	11.1099	0.852918	2.73964	0.805794
GH32A	-0.1949	5.58003	1.29735	0.146269	150.779	1915.81	6879.25	1802.44	234.488	98.4575	736.772	4829.98	1.91379	175.423	37.5686	58.0672	107.837	23573	2.23762	5.45695	11.732	64.6019	2.45711	0.199506	2.26041	0.146615	1427.24	3.79409	17.3194	1.51918	4.91112	0.0946061	1.31418	0	0	1.30306	0.186373	0.0545805	0.0310589	1.97723	0.0544387	0.0718052	0.255536	43.0077	2.49468	7.26452	0.854944	2.67944	0.601255
GH32B	-0.1949	5.58003	1.79869	0.179522	199.461	2723.04	8502.33	1648.37	266.2	79.6171	710.329	5919.8	2.16163	203.662	42.0597	48.1809	152.527	33318.3	3.43561	7.78633	30.0079	98.2806	2.9458	0.300625	2.56714	0.158051	1345.24	4.56879	20.0399	2.52099	8.00474	0.123317	2.14584	0	0.0175181	2.05336	0.270546	0.0794941	0.032136	1.8313	0.105513	0.0658654	0.31086	44.7758	4.18274	8.37883	1.3692	4.43909	0.981004
GH32C	-0.1949	5.58003	1.25635	0.2102	80.439	1857.91	6851.06	1266.65	270.843	57.1852	505.348	4720.46	1.49628	162.727	34.7809	32.5581	117.425	23473.1	2.62496	5.17517	20.3655	65.8927	2.39931	0.177006	2.54738	0.191102	1317.34	3.59756	13.1193	2.42146	5.93062	0.196451	1.17914	0	2.89143e-05	1.52542	0.18979	0.0555407	0.0259916	1.29913	0.140719	0.0649596	0.254991	29.541	2.19649	5.3113	0.962126	3.03983	0.679771
GH33	-0.198733	5.57323	1.09963	0.0918988	153.257	1240.24	4784.02	1159.62	163.569	100.791	594.417	3667.36	1.24048	155.861	21.0323	95.381	133.133	13350.4	2.08297	5.5575	10.5973	92.7882	1.59347	0.123993	1.54542	0.0680656	1033.54	3.25436	14.0675	1.76007	5.69837	0.087602	1.14658	0	0.017341	1.37235	0.275463	0.126293	0.0225323	0.899819	0.11094	0.0604544	0.189538	56.8925	2.13807	7.34327	1.10559	2.57594	0.593251
GH34	-0.200983	5.56818	1.57007	0.184041	291.122	3355.32	9141.35	1949.92	291.731	109.646	959.834	7359.56	2.73946	341.788	36.4152	59.2431	294.612	27645.8	4.11967	10.4055	44.0414	188.384	2.98228	0.269595	1.94066	0.109383	1798.4	4.90527	27.0549	4.03615	9.19513	0.153765	3.35809	0	0.0537519	3.61619	0.302271	0.160545	0.0347075	2.62086	0.204888	0.0863391	0.311581	76.8109	4.56041	20.2618	2.05155	5.08658	1.14466
GH35	-0.205967	5.55957	2.06412	0.215222	48.95	802.006	8938.08	1377.18	192.423	93.0246	624.158	3345.75	1.41422	174.609	29.4078	37.9715	203.388	15171.4	6.55388	6.09142	8.1041	49.9702	2.53832	0.191937	1.39322	0.154439	1244.94	5.25053	16.1241	2.30703	7.12021	0.0517207	0.946944	0	0.00182243	1.68215	0.208056	0.0703586	0.0207393	0.761597	0.0439703	0.0778937	0.325949	59.9951	4.02242	44.8035	1.52261	4.26076	0.943948
GH36	-0.2094	5.55765	1.49463	0.140343	238.617	1464.88	6017.89	1930.07	284.895	311.736	963.94	11398.8	1.33011	222.278	23.3441	31.9879	179.48	18694.1	2.5559	6.89166	23.6325	271.567	2.0179	0.193278	2.00358	0.0708605	1743.41	4.43002	50.3525	1.79629	8.15038	0.15142	1.24924	0	0.00309136	1.8469	0.276216	0.874622	0.026368	2.02805	2.13921	0.0821073	0.310207	87.4356	2.49818	6.05101	0.928294	2.65538	0.591775
GH37	-0.211133	5.5528	1.14933	0.0655785	216.372	984.057	4774.09	1895.11	277.562	517.019	858.977	6049.37	0.984917	194.763	14.8299	15.6773	111.247	9101.62	2.22655	4.99307	13.837	92.5588	1.46526	0.100999	0.548654	0.0234935	1723.59	4.00033	21.6467	1.6947	4.20021	0.154973	0.768298	0	0	1.03721	1.57613	1.36225	0.0214228	0.971622	0.661471	0.0624577	0.244787	54.9322	2.67675	6.72445	0.93964	2.81487	0.578018
GH38A	-0.213633	5.55058	1.3123	0.106966	2478.8	1269.84	4671.73	2032.61	1023.42	2710.36	2311.82	14069.8	0.566192	147.915	8.87801	32.8451	119.044	7801.4	2.68792	8.64897	70.3809	603.073	1.41269	0.163093	2.33693	0.105442	1535.39	5.35415	78.8547	1.13881	5.01318	0.181467	1.18513	0	0.00818481	0.859291	0.326934	0.769443	0.022357	2.00049	1.61849	0.0503511	0.292314	65.6384	2.38601	5.46405	0.855797	2.44492	0.528722
GH38B	-0.213633	5.55058	0.766022	0.0777868	2026.49	706.897	3700.76	1423.01	1013.42	2520.18	1690.07	8321.05	0.522915	111.68	10.1049	139.568	144.599	14752.9	2.01889	6.0887	33.5314	224.89	1.16699	0.408611	3.06615	0.0910449	1491.11	3.38322	42.476	1.77313	4.36856	0.161417	1.1674	0	0.00260747	1.23348	0.267553	0.678276	0.0176025	2.24228	1.43195	0.0620045	0.202058	47.6082	1.56095	4.05642	0.653717	1.74321	0.257028
GH38C	-0.213633	5.55058	1.10627	0.118081	4117.64	1164.43	4273.22	2000.04	1192.92	5156.11	2896.18	13976.9	0.505956	168.861	8.9254	48.9174	124.733	12583.5	2.1075	8.26172	54.8256	322.395	1.28106	0.210201	2.1523	0.0659796	1661.78	5.40271	89.4732	1.02885	4.89718	0.203869	2.13927	0	0.00765	0.858222	0.570708	0.932208	0.0178235	1.39654	2.29622	0.0850978	0.253344	73.8756	1.8938	4.22101	0.66754	1.95867	0.491446
GH39	-0.21585	5.54747	2.57557	0.162598	487.17	1776.41	7061.59	1243.35	411.666	402.433	943.777	15809.6	1.62294	185.229	29.0254	37.4254	161.246	18535.1	3.3415	9.5029	26.8251	262.273	2.22401	0.21226	2.67182	0.092129	1018.7	5.68565	61.0935	2.32187	5.98663	0.0717442	1.50259	0	0.00529887	1.72581	8.63424	0.453966	0.165769	2.14682	0.802386	0.0507541	0.313109	59.0918	3.42598	9.02688	1.42091	4.76833	1.09108
GH40	-0.22385	5.57187	1.59222	0.121785	792.096	3955.08	8408.58	2091.45	285.521	213.229	894.125	11167.5	3.29776	333.94	29.2865	24.7143	221.483	15947	5.1572	8.41805	17.7813	69.5893	2.48248	0.172569	0.775969	0.0552926	1727.75	3.91272	42.264	2.83119	5.92155	0.117866	0.737575	0	0.0180313	2.24819	0.196317	0.0673026	0.0228812	0.425237	0.0899272	0.0803192	0.256929	34.2639	3.41942	8.26651	1.34304	4.31267	0.889055
GH41	-0.224517	5.56592	1.09813	0.234994	1022.36	4265.8	12203	1684.18	229.632	120.576	695.659	10316.6	4.18334	308.182	51.1673	116.572	264.999	30530.1	5.65816	13.0378	32.7752	99.8096	3.43056	0.261138	1.2214	0.226123	1336.65	2.7771	34.124	3.53327	6.48599	0.124688	3.61245	0	0.00691866	2.49993	0.232905	0.133888	0.0319148	0.673699	0.108395	0.0824693	0.180614	39.8627	3.01286	7.6335	1.46625	4.85743	1.19745
GH42A	-0.223017	5.55938	1.25137	0.145362	635.999	2785.79	8633.42	1304.32	195.72	217.938	728.857	8682.5	2.54899	257.294	24.451	34.8265	218.351	16937.9	4.86623	8.65397	47.6696	117.536	2.26584	0.185893	1.16104	0.0241653	1249.05	3.54592	28.1207	2.93212	5.41564	0.106361	1.40229	0	0.00333441	1.89602	0.214103	0.211029	0.0238624	1.13733	0.312684	0.0639246	0.210008	60.4439	2.316	8.79789	1.04516	3.43736	0.811347
GH42B	-0.223017	5.55938	0.770895	0.0995311	290.093	1473.83	4893.35	1145.84	177.704	217.073	484.64	5706.06	1.32242	130.286	15.2319	25.5524	115.758	10848.6	2.7639	4.78738	114.967	75.4	1.34528	0.0836907	1.69006	0.0102524	1121.53	2.19057	21.8269	1.69014	2.71442	0.112788	0.60646	0	0.00610216	1.12327	0.115202	0.0776008	0.0156524	0.843105	0.25146	0.0327244	0.160103	28.8144	1.03485	3.11733	0.394119	1.41854	0.363054
GH42C	-0.223017	5.55938	1.01596	0.143554	368.012	1883.15	5928.75	1404.41	211.913	184.908	578.124	5951.77	1.73194	173.051	20.6971	34.7685	169.749	15122.2	3.11465	7.11423	21.862	71.1903	1.80951	0.13207	2.09711	0.00266756	1371.82	2.52876	20.3724	2.09764	3.66002	0.11838	0.872161	0	0.000146569	1.44701	0.159805	0.120901	0.0184802	0.55146	0.249809	0.0729476	0.174685	42.2227	2.31127	5.32243	0.739702	2.45446	0.559195
GH43	-0.225717	5.55648	1.52542	0.0491087	225.04	1394.78	4272.44	1227.65	462.459	293.506	448.205	5402.66	1.18616	115.029	20.6674	47.208	1099.55	124016	20.7605	32.1121	783.579	108.168	3.12876	1.26084	2.5129	0	1142.16	1.96298	16.5126	1.5575	3.40911	0.132944	2.32484	0	0.0444286	1.30507	0.177879	0.202152	0.0163381	1.30011	0.9405	0.0634472	0.145705	48.9066	1.11494	3.56696	0.440326	1.37697	0.330839
GH44	-0.224	5.58282	2.40822	0.214372	1264.05	5795.3	10438.3	1704.71	270.126	215.948	755.91	10975.4	4.63885	402.173	42.6786	37.1445	223.289	22995.2	8.53868	14.7369	22596.1	93.506	2.91595	0.216885	1.46103	0.0434471	1605.17	2.40944	41.5607	4.2978	10.1978	0.0958193	1.71452	0.0120913	1.32201	6.51857	1.77531	1.06679	0.0237429	0.523691	0.144412	0.117729	0.213741	86.3254	2.73094	7.95445	1.20457	4.29827	1.15444
GH45	-0.22155	5.59508	1.75304	0.208999	215.81	1940.23	8292.61	1527.45	231.812	103.154	898.733	8409.51	2.27903	316.738	30.3086	48.346	331.258	23371.4	5.52009	9.48665	38.3434	149.969	2.62599	0.229606	3.88537	0.0960945	1428.04	5.03594	28.4315	3.68267	9.48934	0.141191	1.52033	0	0.0145919	2.47772	0.590996	0.159091	0.0256128	1.34165	0.269842	0.0786599	0.30023	86.0369	5.79164	18.7649	2.18268	6.36597	1.28557
GH46	-0.2243	5.60673	2.13416	0.199463	316.815	1487.17	7758.13	1693.43	253.382	331.239	1075.27	8966.36	1.82061	274.543	26.0898	43.9638	215.425	20887	3.22497	9.56199	26.4641	149.021	2.61598	0.2435	1.64444	0.0787187	1464.19	5.98486	38.628	2.8012	6.12554	0.15651	2.07214	0	0.00225829	1.99224	0.215481	0.270022	0.0285001	1.90718	0.201911	0.0683174	0.309913	63.6862	11.6152	25.3961	3.40075	9.94667	1.46573
GH47	-0.223917	5.62088	1.66048	0.164443	89.3737	1002.38	9233.93	1966.49	294.787	175.13	850.545	4749.26	1.64705	232.115	26.5106	26.6614	133.805	16408.2	3.44082	6.81743	14.6628	70.7113	2.55836	0.175029	1.63758	0.116352	1844.05	5.5417	17.5523	2.7352	7.76713	0.222935	0.943473	0	0.00146292	1.91482	0.237439	0.0917431	0.0212162	0.0892331	0.669496	0.0892331	0.3531	49.5679	3.64517	12.1114	1.44959	4.11762	0.904766
GH48	-0.2048	5.59193	1.04277	0.166676	811.923	3457.21	9125.05	2096.41	20084.9	262.538	861.358	11037.1	3.03893	334.403	35.6588	37.3066	219.226	20683.7	4.54398	10.2814	30.9631	105.307	2.69278	0.181472	1.49886	0.102435	1855.25	3.46933	36.231	2.85663	7.6262	0.129607	0.883754	0	0.00392656	1.84069	0.311569	0.293485	0.0252774	0.477532	0.14969	0.0953152	0.241225	52.3444	2.52032	7.66625	1.02164	3.48281	0.881406
GH49	-0.228533	5.62832	0.906367	0.232863	364.868	2470.07	8186.86	1813.29	264.417	122.11	790.754	7052	2.31281	311.851	35.3865	31.457	375.186	18940.7	4.24872	7.41752	17.6152	55.4934	2.5414	0.198298	1.12269	0.0480675	1719.83	3.19571	18.492	3.2145	5.88323	0.152217	0.661615	0	0	2.2506	0.192745	0.0624134	0.020778	0	0.0584434	0.0883179	0.206629	88.4033	7.34309	17.2474	2.86381	8.78696	1.61922
GH50	-0.1878	5.59955	2.04273	0.849006	447.809	3367.05	15230.6	1484.4	245.163	143.947	1233.4	9472.23	5.01712	349.1	71.8121	213.636	253.842	53399.3	6.12297	12.6041	24.0248	69.4734	4.30185	0.30271	2.67523	0.18907	1440.35	7.14495	22.6683	4.44208	11.6186	0.151355	1.49056	0.00365489	0.000685292	2.99555	0.316373	0.058494	0.0425381	0.0378565	0.0900687	0.190948	0.353256	48.1637	4.65096	11.811	2.0483	6.48268	1.6211
GH51	-0.191217	5.61095	0.92274	0.142452	204.373	1455.64	6394.32	1496.78	275.272	178.393	512.805	4103.93	1.64719	179.269	32.4446	35.739	96.7412	17601.6	2.88421	7.7191	15.5194	47.7995	2.11878	0.147941	0.773726	0.0302354	1787.27	2.59529	14.6541	1.44717	4.87593	0.203289	0.96186	0	0	0.935186	0.164103	0.0292241	0.0212822	0	0.125815	0.093472	0.221149	31.192	1.95199	4.30348	0.698933	2.08686	0.500869
[truncated: 23 more columns]
